# Supplementary material
Source: Elsevier journal article supplement (https://authors.library.caltech.edu/63073/4/mmc3.xlsx)
Supplement: mmc3 [file mmc3.xlsx]

## Sheet: Sheet
A
	L1	L2	L3	L4	L5	R7	R8
L1	NA
L2	217	NA
L3	393	361	NA
L4	402	352	277	NA
L5	400	362	337	252	NA
R7	864	810	916	1159	981	NA
R8	959	838	803	1087	894	262	NA
B
	L1	L2	L3	L4	L5	R7	R8
L1	NA
L2	53	NA
L3	83	96	NA
L4	80	78	70	NA
L5	91	81	92	58	NA
R7	140	136	165	168	157	NA
R8	146	129	137	139	129	49	NA
